# Supplementary material for: The Potential of the FSP1cre-Pparb/d−/− Mouse Model for Studying Juvenile NAFLD
Source: MDPI journal article supplement (doi:10.3390/ijms20205115), 2019-10-15
Supplement: s1 [file s1]

## Supplementary Materials

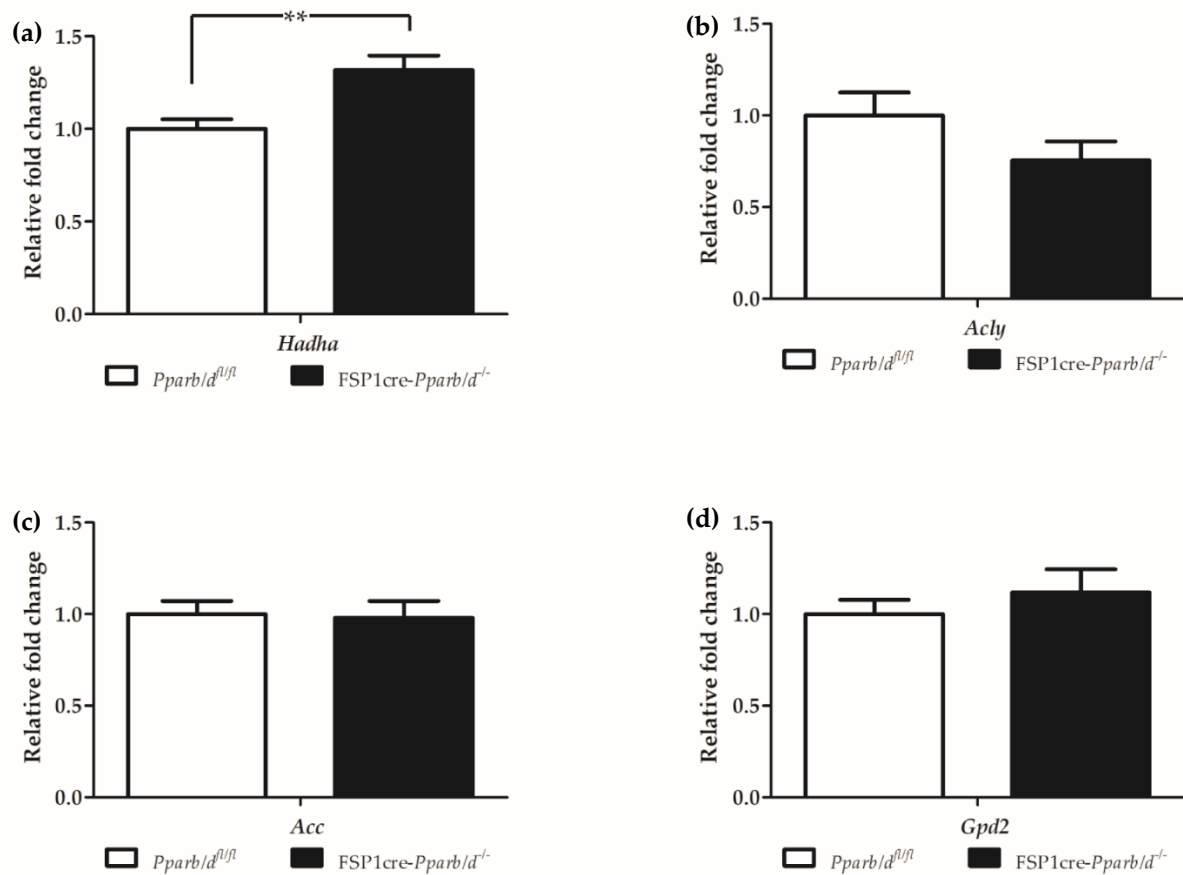

**Figure SM1.** Effect of *Pparb/d* deletion on liver gene expression at P2. Relative fold change in the mRNA levels of specific genes in livers of *Pparb/d<sup>fl/fl</sup>* and *FSP1cre-Pparb/d<sup>-/-</sup>* mice as determined by real-time qPCR. (a) Expression of *Hadha* (presented differently in Figure 6b). (b) *Acly*. (c) *Acc*. (d) *Gpd2*. Values are normalised to the expression of *Gapdh*. Normalised values from controls were arbitrarily assigned a value of 1. Two-tailed Mann-Whitney test with values shown as mean  $\pm$  s.e.m, n = 9-10 biological replicates per group. \*\*  $P < 0.01$ ; *FSP1cre-Pparb/d<sup>-/-</sup>* vs *Pparb/d<sup>fl/fl</sup>* controls.

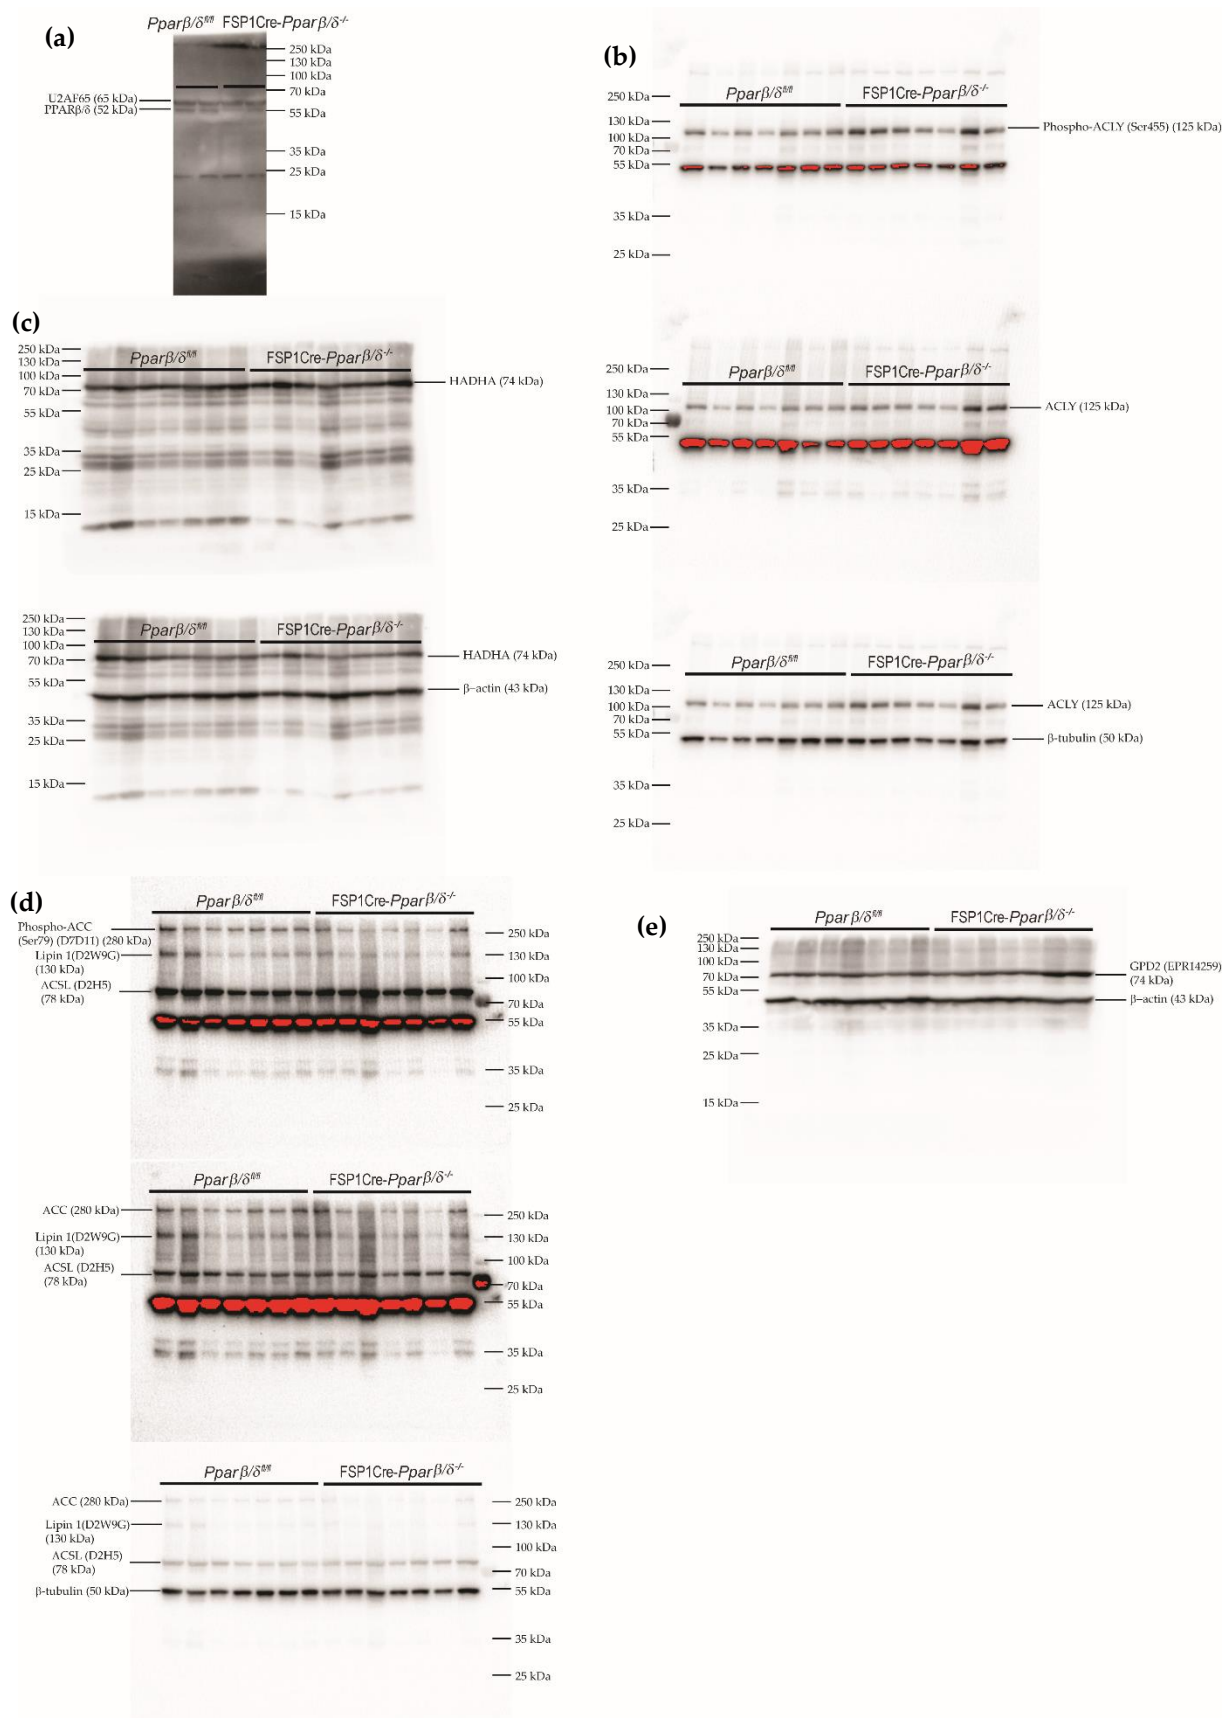

**Figure SM2.** Images of the original Western Blots. **(a)** Immunoblot analysis of PPARβ/δ in P2 *Pparb/d<sup>fl/fl</sup>* and *FSP1cre-Pparb/d<sup>-/-</sup>* whole livers (2 livers for each genotype) with U2AF65 as loading and transfer control. **(b)** Immunoblot analysis of phospho-ACLY and ACLY in P2 *Pparb/d<sup>fl/fl</sup>* and *FSP1cre-Pparb/d<sup>-/-</sup>*

whole livers (7 livers for each genotype) with  $\beta$ -tubulin as loading and transfer control. **(c)** Immunoblot analysis of HADHA in P2 *Pparb/d<sup>fl/fl</sup>* and FSP1cre-*Pparb/d<sup>-/-</sup>* whole livers (7 livers for each genotype) with  $\beta$ -actin as loading and transfer control. **(d)** Immunoblot analysis of phospho-ACC and ACC in P2 *Pparb/d<sup>fl/fl</sup>* and FSP1cre-*Pparb/d<sup>-/-</sup>* whole livers (7 livers for each genotype) with  $\beta$ -tubulin as loading and transfer control. **(d)** Immunoblot analysis of phospho-ACLY and ACLY in P2 *Pparb/d<sup>fl/fl</sup>* and FSP1cre-*Pparb/d<sup>-/-</sup>* whole livers (7 livers for each genotype) with  $\beta$ -tubulin as loading and transfer control. **(e)** Immunoblot analysis of GPD2 in P2 *Pparb/d<sup>fl/fl</sup>* and FSP1cre-*Pparb/d<sup>-/-</sup>* whole livers (7 livers for each genotype) with  $\beta$ -actin as loading and transfer control. The red bands indicate oversaturation of signals, which are not used in quantification of respective protein expression levels.
